# Supplementary material for: L59 TGF-β LAP degradation products serve as a promising blood biomarker for liver fibrogenesis in mice
Source: PubMed Central journal article supplement (PMC4570586; doi:10.1186/s13069-015-0034-9), 2015-09-15

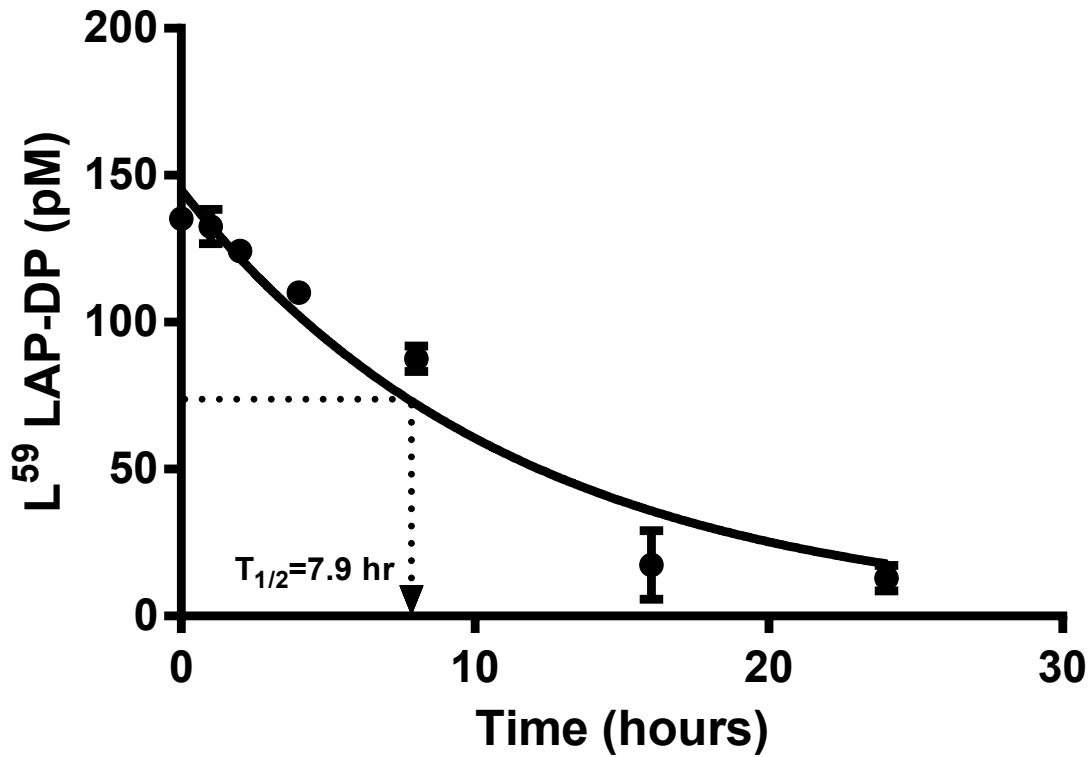

Supplement: 13069_2015_34_MOESM2_ESM.pdf [file 13069_2015_34_MOESM2_ESM.pdf]
